# Supplementary material for: Temporal trends in respirable dust and respirable quartz concentrations within the European industrial minerals sector over a 15-year period (2002–2016)
Source: HighWire-hosted journal article supplement (doi:10.1136/oemed-2019-106074), 2020-02-07
Supplement: oemed-2019-106074supp001_data_supplement.pdf [file oemed-2019-106074supp001_data_supplement.pdf]

## Supplemental Material

### Temporal Trends in Respirable Dust and Respirable Quartz Concentrations within the European Industrial Minerals Sector over a 15-year period (2002-2016)

Hicham Zilaout<sup>1</sup>, Remko Houba<sup>1,2</sup> and Hans Kromhout<sup>1</sup>

<sup>1</sup>Division of Environmental Epidemiology, Institute for Risk Assessment Sciences, Utrecht University, Utrecht, The Netherlands;

<sup>2</sup> Netherlands Expertise Centre for Occupational Respiratory Disorders (NECORD), Utrecht, The Netherlands

#### Table of Contents

**Supplementary material 1.** Ratios reported in the literature for respirable dust and respirable quartz

**Supplementary material 2.** Estimated differences in temporal trends between time periods adjusted for random effects of site, job and worker

### Supplementary material 1: Ratios reported in the literature for respirable dust and respirable quartz

In *Table S1a* the applied efficiency factors are presented for the respirable dust samplers present in the IMA-DMP database.

**Table S1a** Efficiency factors used for analysis of temporal trends

| Respirable Samplers                 | Respirable dust | Respirable quartz |
|-------------------------------------|-----------------|-------------------|
| DO <sup>a</sup>                     | 0.89            | 0.76              |
| CIP10-R <sup>b</sup>                | 0.86            | 0.75              |
| SKC <sup>c</sup>                    | 1.35            | 1.50              |
| IOM <sup>d</sup>                    | 0.96            | 1.00              |
| FSP-10 <sup>e</sup>                 | 0.92            | 0.96              |
| HD <sup>f</sup> /BCIRA <sup>g</sup> | 1.00            | 1.00              |

These factors are based on the results of three field studies, which are summarized below in *Table S1b* (Refs. 1, 4, 7). For the CIP10-R the average of the results from the two field studies were used (see *table S1a*).

**Table S1b** Efficiency factors for respirable dust samplers from field studies

| Field studies        |                 |                   |                    |     |
|----------------------|-----------------|-------------------|--------------------|-----|
| Respirable Samplers  | Respirable dust | Respirable quartz | Reference sampler  | Ref |
| DO <sup>a</sup>      | 0.89            | 0.76              | BCIRA <sup>g</sup> | 1   |
| CIP10-R <sup>b</sup> | 0.77            | 0.60              | BCIRA              | 1   |
|                      | 0.94            | 0.89              | HD                 | 4   |
| SKC <sup>c</sup>     | 1.35            | 1.50              | BCIRA              | 1   |
| IOM <sup>d</sup>     | 0.96            | 1.00              | HD <sup>f</sup>    | 7   |
| FSP-10 <sup>e</sup>  | 0.92            | 0.96              | HD                 | 4   |
| SIMPEDS <sup>h</sup> | 1.18            | 1.37              | BCIRA              | 1   |

Results of wind tunnel studies with the respirable samplers are shown in *Table S1c* (Refs 2, 3, 5, 6, 8). These results compare relatively well with the field studies. However, given the non-experimental setting of the measurements collected within the IMA-DMP the efficiency factors based on the field studies were used to adjust under and over-sampling of respirable dust and respirable quartz.

**Table S1c** Efficiency factors for respirable dust samplers from experimental studies

| Experimental studies |                 |                 |                  |          |                   |          |                   |     |
|----------------------|-----------------|-----------------|------------------|----------|-------------------|----------|-------------------|-----|
| Respirable Samplers  | Respirable dust |                 |                  |          | Respirable quartz |          |                   | Ref |
|                      | Fine dust       | UF <sup>i</sup> | ARD <sup>j</sup> | UF & ARD | Fine dust         | UF & ARD | Reference sampler |     |
| BCIRA <sup>g</sup>   |                 | 1.01            | 1.05             |          |                   |          | SIMPEDS           | 2   |
| Cip10-R <sup>b</sup> |                 | 0.85            | 0.95             | 0.84     |                   | 0.88     | SIMPEDS           | 2   |
|                      | 0.75            |                 |                  |          | 0.60              |          | SIMPEDS           | 3   |
|                      | 0.76            |                 |                  |          |                   |          | SIMPEDS           | 5   |
|                      |                 |                 |                  |          | 0.96              |          | HD                | 6   |
|                      |                 |                 |                  |          |                   | HD       | 8                 |     |
| DO <sup>a</sup>      |                 | 0.92            | 0.84             |          |                   |          | SIMPEDS           | 2   |
|                      |                 |                 |                  | 0.83     |                   |          | SIMPEDS           | 3   |
| SKC <sup>c</sup>     |                 | 1.30            | 1.40             |          |                   |          | SIMPEDS           | 2   |
| IOM <sup>d</sup>     |                 | 0.82            | 0.80             |          |                   |          | SIMPEDS           | 2   |
|                      |                 |                 | 0.78             |          |                   |          | SIMPEDS           | 3   |
| FSP-10 <sup>e</sup>  |                 | 1.11            | 1.13             | 0.99     |                   | 1.07     | SIMPEDS           | 2   |
|                      |                 |                 |                  |          |                   |          | SIMPEDS           | 2   |
|                      | 1.14            |                 |                  |          |                   |          | SIMPEDS           | 3   |
|                      |                 |                 |                  |          |                   |          | SIMPEDS           | 5   |
|                      | 0.99            |                 |                  |          |                   |          | SIMPEDS           | 6   |
|                      |                 |                 |                  | 1.13     |                   | HD       | 8                 |     |

<sup>a</sup> Dorr-Oliver

<sup>b</sup> Capteur individuel de poussières

<sup>c</sup> SKC LTD (company name)

<sup>d</sup> Institute of Occupational Medicine sampler

<sup>e</sup> Fein staub probe

<sup>f</sup> Higgins-Dewell

<sup>g</sup> British Cast Iron Research Association

<sup>h</sup> Safety In Mines Personal Dust sampler

<sup>i</sup> Ultrafine Arizona road dust

<sup>j</sup> Medium Arizona road dust

## References

- 1 Verpaele S, Jouret J. A comparison of the performance of samplers for respirable dust in workplaces and laboratory analysis for respirable quartz. *Ann Occup Hyg* 2013;**57**:54–62.
- 2 Stacey P, Mecchia M, Verpaele S, *et al.* Differences Between Samplers for Respirable Dust and the Analysis of Quartz—An International Study. In: *Silica and Associated Respirable Mineral Particles*. 2013. 73–102.
- 3 Stacey P, Lee T, Thorpe A, *et al.* Collection efficiencies of high flow rate personal respirable samplers when measuring Arizona road dust and analysis of quartz by X-ray diffraction. *Ann Occup Hyg* 2014;**58**:512–23.
- 4 Lee T, Harper M, Kashon M, *et al.* Silica Measurement with High Flow Rate Respirable Size Selective Samplers: A Field Study. *Ann Occup Hyg* 2016;**60**:334–47.
- 5 Stacey, P. and Thorpe, A. Testing of High Flow Rate Respirable Samplers to Assess the Technical Feasibility of Measuring 0.05 mg m<sup>-1</sup> Respirable Crystalline Silica". Health and Safety Executive Research Report RR825, HSE Books, Sudbury. UK, 2009.
- 6 Lee T, Kim SW, Chisholm WP, *et al.* Performance of high flow rate samplers for respirable particle collection. *Ann Occup Hyg* 2010;**54**:697–709.
- 7 De Vocht F, Hirst A, Gardner A. Application of PUF foam inserts for respirable dust measurements in the brick-manufacturing industry. *Ann Occup Hyg* 2009;**53**:19–25.
- 8 Lee T, Lee EG, Kim SW, *et al.* Quartz measurement in coal dust with high-flow rate samplers: Laboratory study. *Ann Occup Hyg* 2012;**56**:413–25.

**Supplementary material 2.** Estimated differences in temporal trends between time periods adjusted for random effects of site, job and worker

**Table S2a** Estimated differences in temporal trends between time periods for respirable dust

| Respirable dust     |        |          |                |                   |                   |                   |
|---------------------|--------|----------|----------------|-------------------|-------------------|-------------------|
| Effect              | period | Estimate | Standard Error | Pr >  t           | Lower CI estimate | Upper CI estimate |
| Intercept           | –      | -0.082   | 0.191          | 0.675             | -0.459            | 0.296             |
| time trend          | –      | -0.058   | 0.006          | <0.0001           | -0.070            | -0.046            |
| time trend x period | 1      | -0.017   | 0.007          | <b>0.013</b>      | -0.031            | -0.004            |
| time trend x period | 2      | 0.043    | 0.008          | <b>&lt;0.0001</b> | 0.026             | 0.059             |
| time trend x period | 3      | 0        | .              | .                 | .                 | .                 |

**Table S2b** Estimated differences in temporal trends between time periods for respirable quartz

| Respirable quartz   |        |          |                |                   |                   |                   |
|---------------------|--------|----------|----------------|-------------------|-------------------|-------------------|
| Effect              | period | Estimate | Standard Error | Pr >  t           | Lower CI estimate | Upper CI estimate |
| Intercept           | –      | -2.129   | 0.262          | <0.0001           | -2.647            | -1.610            |
| time trend          | –      | -0.096   | 0.009          | <0.0001           | -0.118            | -0.084            |
| time trend x period | 1      | 0.077    | 0.009          | <b>&lt;0.0001</b> | 0.059             | 0.096             |
| time trend x period | 2      | 0.142    | 0.011          | <b>&lt;0.0001</b> | 0.120             | 0.165             |
| time trend x period | 3      | 0        | .              | .                 | .                 | .                 |

Statistically significant temporal trends were observed for respirable dust and respirable quartz in different periods (manuscript, Table 2). To see whether the differences in time trends between the time periods were statistically significant we added an interaction term 'time trend x period' to the model. These analyses clearly showed that the differences in time trend between periods were significantly different for both respirable dust and respirable quartz.
